# Supplementary material for: Social Network, Food Patterns, Physical Activity and Associations with Overweight and Obesity in Adolescents from a School in Rural Brazil
Source: MDPI journal article supplement (doi:10.3390/nu15153305), 2023-07-26

**Figure S1:** ROC curve of the adjusted models - model 1 and model 2.

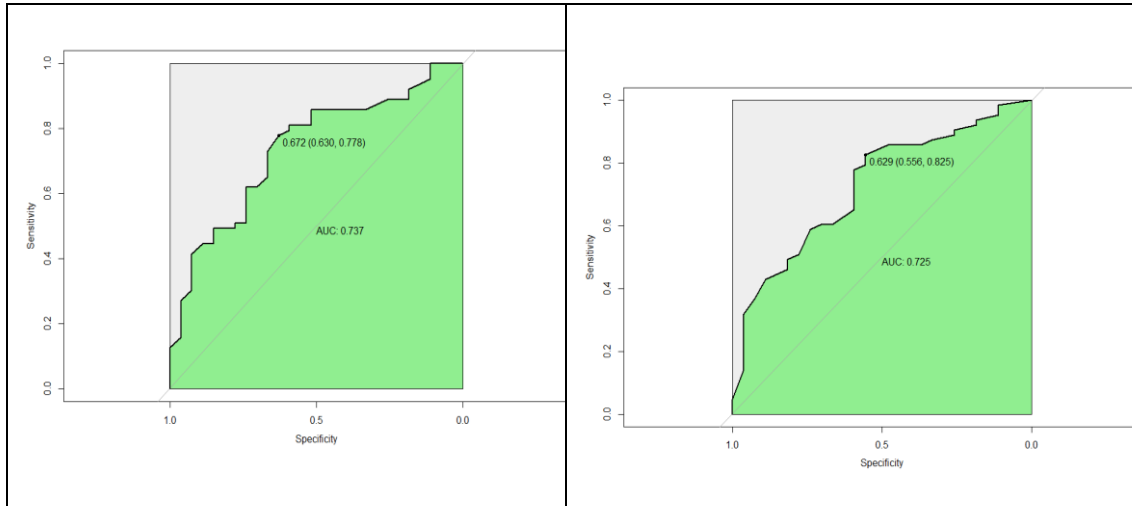

**Figure S2:** ROC curve of the adjusted models - model 1 and model 2.

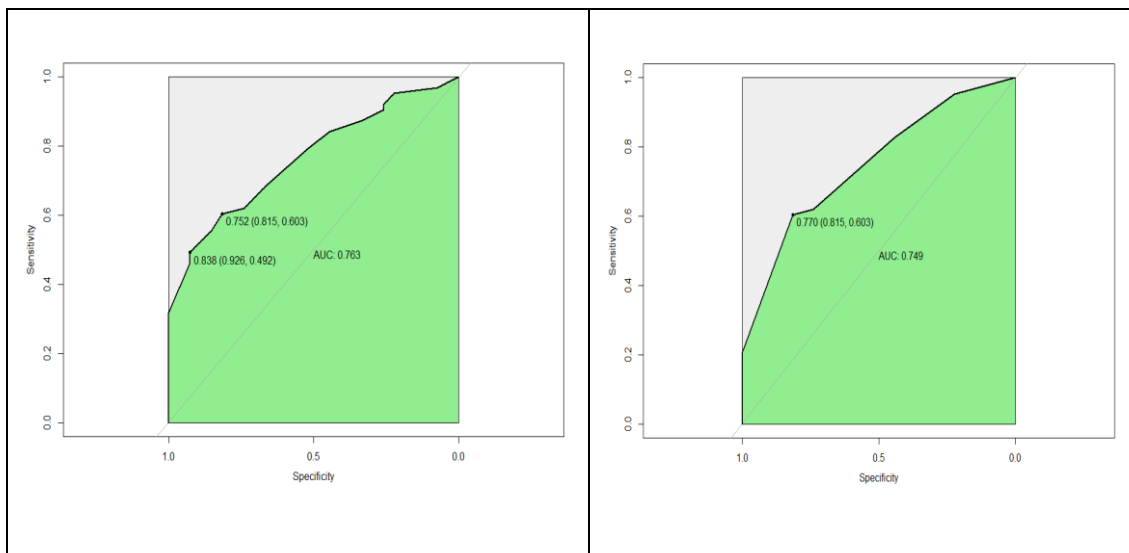

Supplement: s1 [file s1]
